# Supplementary material
Source: HighWire-hosted journal article supplement (doi:10.1101/rna.043968.113)

Supporting information for:

## **The role of antisense long non-coding RNA in small RNA-triggered gene activation**

Xizhe Zhang<sup>1</sup>, Haitang Li<sup>2</sup>, John C. Burnett<sup>1\*</sup>, and John J. Rossi<sup>1,2\*</sup>

\* correspondence should be addressed to J.C.B. ([jburnett@coh.org](mailto:jburnett@coh.org)) or J.J.R. ([jrossi@coh.org](mailto:jrossi@coh.org))

### **Contents**

#### ***Supplemental Figures S1-S7***

**Fig. S1.** The effects of promoter-targeted shRNAs in eight *CMV-eGFP* HeLa clones.

**Fig. S2.** Involvement of Ago2 in shRNA-induced TGA.

**Fig. S3.** Promoter-associated antisense RNAs are detected in *CMV-eGFP* clones.

**Fig. S4.** Mapping of antisense transcription in D1 clone by RACE PCR.

**Fig. S5.** Mapping of antisense transcription in E3 clone by RACE PCR.

**Fig. S6.** Detection of antisense lncRNAs in PA5 cells.

**Fig. S7.** Antisense lncRNAs mediate TGA in *cis*.

#### ***Supplemental Tables S1-S3***

**Table S1.** The integration sites of *CMV-eGFP* clones.

**Table S2.** The sequences of shRNAs used in this study.

**Table S3.** Primers used for qRT-PCR, ChIP, and genotyping.

#### ***Supporting Text S1-S5***

**Text S1.** Sequencing result for C5-AS1 lncRNAs.

**Text S2.** Sequencing result for the antisense RNAs in C5 cells detected by 3' RACE PCR.

**Text S3.** Sequencing result for 5' RACE PCR result of D1 antisense lncRNAs.

**Text S4.** Sequencing result for the antisense RNAs in E3 cells detected by 3' RACE PCR.

**Text S5.** Sequencing result for the antisense RNAs in PA5 cells detected by 5' RACE.

## Captions for Supplementary Figures S1-S7

**Figure S1.** The effects of promoter-targeted shRNAs in eight *CMV-eGFP* HeLa clones.

S1A. The effect of *CMV*-targeting shRNAs on *eGFP* expression in HeLa clone D1. Cells were treated with shRNAs that targeted the *CMV* promoter region in the sense (S) and antisense (AS) orientations, as measured by qRT-PCR. Each shRNA targets a 19-nucleotide sequence, and the target sequence is shifted by a single nucleotide for each shRNA. For instance, the target sequence for shRNA-(-1)AS lies one nucleotide upstream of shRNA-(0), while the target sequence for shRNA-(1)AS is positioned one nucleotide downstream of shRNA-(0). Sequences of the shRNAs are provided in Supplementary Table 2.

S1B. *EGFP* mRNA levels for seven *CMV-eGFP* clones after transfection with promoter-targeting shRNAs. *CMV-eGFP* HeLa clones C3, C4, C6, C8, D2, D3, and E4 were analyzed for enhanced EGFP expression by qRT-PCR after treatment with shRNA-(-4)AS, shRNA-(-4)S, shRNA-(0)AS, and shRNA-(0)S, as performed in Figures 2A and S1A.

S1C. Western blot of EGFP protein levels for control-shRNA (left column), shRNA-(0)AS (center column), and shRNA-(-4)AS (right column) for HeLa clone C5.  $\alpha$ -tubulin is the loading control.

S1D. Constitutive *eGFP* mRNA levels for seven *CMV-eGFP* clones. EGFP expression was measured by qRT-PCR in cells without shRNA transfection for each of the seven *CMV-eGFP* HeLa clones from S1B.

**Figure S2.** Involvement of Ago2 in shRNA-induced TGA.

S2A. Quantitative RT-PCR to detect TGA response in normal D1 clones (black bars) or D1 clones with depleted levels of endogenous Ago2 (gray bars). Anti-Ago2 siRNAs and plasmids expressing TGA-inducing shRNAs were co-transfected into cells. The RNA samples were extracted four days post-transfection for analysis.

S2B. Western blot of 3XHA-Ago2 protein in HeLa C5 cells using an antibody against the HA tag. From right to left, cells were transfected with control shRNA and 3XHA-Ago2 plasmid (left column), shRNA-(0)AS and 3XHA-Ago2 plasmid, shRNA-(-4)AS and 3XHA-Ago2 plasmid, or a 3XHA-control vector.

S2C. Western blot of endogenous and overexpressed Ago2. Wild type 3XHA-Ago2 (center column) and 3XHA-Ago2 Q633R/H634P mutant (right column) proteins are expressed in C5 cells at a similar level to endogenous Ago2 (left column) as detected by Western blot using antibody against the endogenous Ago2.

S2D. Wild type Ago2 and mutant Ago2 incorporate TGA-triggering shRNA. Wild type 3XHA-Ago2 (left column) or 3XHA-Ago2 Q633R/H634P mutant (center column) proteins were immunoprecipitated, followed by Northern blot of the shRNA using 25-nt 32P-radiolabeled probes. The size of the band ( $\approx$ 20 bp) suggests that the shRNA has been processed into a single-stranded RNA that was incorporated into Ago2 or the Q633R/H634P Ago2 mutant.

S2E. Ago2 chromatin immunoprecipitation at the *GAPDH* promoter. CHIP for 3XHA-Ago2 (center column) or 3XHA-Ago2 Q633R/H634P mutant was followed by qPCR against the *GAPDH* promoter region in C5 clones transfected with shRNA-(-4)AS.

S2F. Wild type and Q633R mutant Ago2 are enriched at the *CMV* promoter. CHIP for

3XHA-Ago2 (center column) or 3XHA-Ago2 Q633R/H634P mutant was followed by qPCR against the *CMV* promoter region in C5 clones transfected with shRNA-(-4)AS.

**Figure S3.** Promoter-associated antisense RNAs are detected in *CMV-eGFP* clones.

S3A. Promoter-associated antisense RNAs are detected in C5, D1, and E3 by strand-specific RT-PCR. As a negative control, each prepared RNA sample was processed without MMLV-RT, which yielded no detectable PCR product for each clone. Primer sequences are described in Supplementary Table 3.

S3B. Promoter-associated antisense RNA levels are represented as RNA copies per cell in clones C5, D1 and E3, as detected by strand-specific qRT-PCR (See methods for details). As a negative control, each prepared RNA sample was processed without MMLV-RT, which yielded no quantifiable PCR product for each clone. Primer sequences are described in Supplementary Table 3.

S3C. Mutation of shRNA-triggers affects TGA in D1 cells. Levels of *EGFP* mRNA were quantified by qRT-PCR for clone D1 treated with control shRNA, shRNA-(0)AS-M5' (mismatches at nucleotides 1-5), shRNA-(0)AS-(9-11) (mismatches at nucleotides 9-11), or shRNA-(0)AS-M3' (mismatches at nucleotides 15-19). Primer sequences are described in Supplementary Table 2.

**Figure S4.** Mapping of antisense transcription in D1 clone by RACE PCR.

S4A. An antisense lncRNA with a mono-phosphate group at the 5' termini is detected in D1 cells by 5' RACE PCR. D1-AS1 originates from the adjacent genomic region 0.75 kb downstream of the 3' terminus of the integrated cassette. CIP/TAP/Ligation (left lane): total RNAs were treated by calf-intestinal alkaline phosphatase (CIP), tobacco acid pyrophosphatase (TAP), and ligated to RNA adaptors before analysis by nested PCR. Only lncRNAs with an intact 5' cap structure can be detected by this method. Ligation (middle lane): total RNAs were mock treated by CIP and TAP sequentially before they were ligated to RNA adaptor and subjected to nested PCR analysis. The lncRNAs with mono-phosphate can be detected by this method. CIP/Ligation (right lane): total RNAs were treated by CIP, ligated to RNA adaptors, and analyzed by nested PCR. This lane shows the general background of 5' RACE. The bands on the gel indicate lengths of nested PCR products, not the absolute lengths of antisense RNA.

S4B. Schematic diagram shows the origination of antisense lncRNAs in D1 cells. The integration site is described in Supplementary Table 1.

**Figure S5.** Mapping of antisense transcription in E3 clone by RACE PCR.

S5A. Strand-specific RT-PCR detects the antisense lncRNAs that are transcribed into the integration site in E3 cells.

S5B. 3' RACE PCR determines the multiple termini of antisense lncRNAs that are transcribed into the integration site in E3.

S5C. Schematic diagram shows the transcribed-through antisense lncRNAs in E3 cells.

**Figure S6.** Detection of antisense lncRNAs in PA5 cells.

S6A. 5' RACE PCR detects the antisense lncRNAs that are transcribed into the integration

site in PA5 cells.

S6B. FISH analysis detects single antisense lncRNAs.

**Figure S7.** Antisense lncRNAs mediate TGA in *cis*.

S7A. PCR genotyping of clones PA5, PA5-1 and PA5-6 using primers that flank the integration junction in chromosome. Results show that all three clones are integrated in the same chromosome sites.

S7B. The *EGFP* mRNA level detected by qRT-PCR in clones PA5-1 and PA5-6.

S7C. Flow cytometry analysis for eGFP expression in HeLa PA5-1 clone (red outline), HeLa PA5-6 clone (blue outline), and control HeLa cells (gray fill).

S7D. Cre-treated PA5-6 were tested for the percentage of cells in which recombination occurs. After treated with Tat-NLS-Cre, recombination occurred in a fraction of the PA5-6 cells. PCR products were subjected to TA cloning and sequencing. About 70% of total cells underwent Cre-mediated recombination, to become the same genotype as the PA5 parent cells.

S7E. There is no change in the eGFP mRNA level before and after treating PA5-6 cells with Cre-recombinase.

S7F. *CMV* antisense lncRNAs were partially recovered after PA5-6 cells were treated with Cre-recombinase.

S7G. A system to provide antisense RNAs in trans: PA5-6 and PA5-1 was first transduced with the retrovirus carrying reverse Tet repressor protein gene (Clontech Tet-On system). At the presence of doxycycline (Dox 1  $\mu\text{g/ml}$ ), antisense RNA is expressed driven by downstream *TRE -miniCMV* promoter.

**Supplemental Table S1.** The integration sites of *CMV-eGFP* clones.

| <b>Clone name</b> | <b>Integration sites</b> | <b>Relationship to the host gene</b> | <b>Host Gene</b> |
|-------------------|--------------------------|--------------------------------------|------------------|
| C3                | Intergenic               | N/A                                  | N/A              |
| C4                | First Intron             | Same Direction                       | CHPt1            |
| C5                | Forth Intron             | Opposite Direction                   | DDI2             |
| C6                | Second Intron            | Opposite Direction                   | PLEC1            |
| C8                | First Intron             | Same Direction                       | EIF2C3           |
| D1                | First Intron             | Same Direction                       | CtGBP1           |
| D2                | Intergenic               | N/A                                  | N/A              |
| D3                | Fourth Intron            | Opposite Direction                   | HtR2C            |
| E3                | Intergenic               | N/A                                  | N/A              |
| E4                | Third Intron             | Opposite Direction                   | VPS13A           |

**Supplemental Table S2.** The sequences of shRNAs used in this study.

|    | <b>shRNA Name</b>   | <b>shRNA Sequence</b> (capital letters represent the shRNA loop) |
|----|---------------------|------------------------------------------------------------------|
| 1  | shRNA-(0)S          | 5' ggaguuccgguuacauaaCCUACCCAuuuanguaacgcggaacucc                |
| 2  | shRNA-(0)AS         | 5' uuauguaacgcggaacuccCCUACCCAaggaguuccgguuacauaa                |
| 3  | shRNA-(-1)S         | 5' uggaguuccgguuacauaCCUACCCAuauanguaacgcggaacucca               |
| 4  | shRNA-(-1)AS        | 5' uauguaacgcggaacuccaCCUACCCAuggaguuccgguuacaua                 |
| 5  | shRNA-(-2)S         | 5' auggaguuccgguuacauCCUACCCAauguaacgcggaacuccau                 |
| 6  | shRNA-(-2)AS        | 5' auguaacgcggaacuccauCCUACCCAauggaguuccgguuacau                 |
| 7  | shRNA-(-3)S         | 5' uauggaguuccgguuacaCCUACCCAuguaacgcggaacuccaua                 |
| 8  | shRNA-(-3)AS        | 5' uguaacgcggaacuccauaCCUACCCAuauuggaguuccgguuaca                |
| 9  | shRNA-(-4)S         | 5' auauuggaguuccgguuacCCUACCCAguaacgcggaacuccauau                |
| 10 | shRNA-(-4)AS        | 5' guaacgcggaacuccauauCCUACCCAauauuggaguuccgguuac                |
| 11 | shRNA-(1)S          | 5' gaguuccgguuacauaacCCUACCCAguuanguaacgcggaacuc                 |
| 12 | shRNA-(1)AS         | 5' guuanguaacgcggaacucCCUACCCAagaguuccgguuacauaac                |
| 13 | shRNA-(2)S          | 5' aguuccgguuacauaacuCCUACCCAaguuauguaacgcggaacu                 |
| 14 | shRNA-(2)AS         | 5' aguuauguaacgcggaacuCCUACCCAaguuccgguuacauaacu                 |
| 15 | shRNA-(3)S          | 5' guuccgguuacauaacuuCCUACCCAaaguuauguaacgcggaac                 |
| 16 | shRNA-(3)AS         | 5' aaguuauguaacgcggaacCCUACCCAguuccgguuacauaacuu                 |
| 17 | shRNA-(0)AS-M3'     | 5' aauacuaacgcggaacuccCCUACCCAaggaguuccgguuaguauuu               |
| 18 | shRNA-(0)AS-M5'     | 5' uuauguaacgcggauaaggCCUACCCAaccuauuccgguuacauaa                |
| 19 | shRNA-(0)AS-M(9-11) | 5' uuauguaauuuggaacuccCCUACCCAaggaguuccaauuacauaa                |
| 20 | shRNA-U6            | 5'<br>cggagacagcgcgagagcUUUGUGUAgcucucgcucgcugucuccg             |

**Supplemental Table S3.** Primers used for qRT-PCR, ChIP, and genotyping.

| <b>ChIP</b>                   | <b>Primer Sequence</b> |
|-------------------------------|------------------------|
| CMV-F                         | CAAGTACGCCCCCTATTGAC   |
| CMV-R                         | AAGTCCCGTTGATTTTGGTG   |
| <b>Strand Specific RT-PCR</b> | <b>Primer Sequence</b> |
| F14 (for RT)                  | CATGACCTTATGGGACTTTC   |
| CMVantisense-F                | CACCAAATCAACGGGACTT    |
| CMVantisense-R                | GCTGAACTTGTGGCCGTTTA   |
| <b>qRT-PCR</b>                | <b>Primer Sequence</b> |
| EGFP-F                        | ACGTAAACGGCCACAAGTTC   |
| EGFP-R                        | AAGTCGTGCTGCTTCATGTG   |
| HRPT1-F                       | TGACACTGGCAAAACAATGCA  |
| HRPT1-R                       | GGTCCTTTTCACCAGCAAGCT  |
| <b>Genotyping</b>             | <b>Primer Sequence</b> |
| Primer set1-F                 | ACATGGTCCTGCTGGAGTTC   |
| Primer set1-R                 | GGCATTAAAGCAGCGTATCC   |
| Primer set2-F                 | CGACAACCACTACCTGAGCA   |
| Primer set2-R                 | GGGAGGTGTGGGAGGTTTT    |
| Primer set3-F                 | CGACAACCACTACCTGAGCA   |
| Primer set3-R                 | GCAATAGCATCACAAATTCACA |

### **Captions for Supporting Text S1-S5**

**Text S1.** Sequencing result for C5-AS1 lncRNAs.

**Text S2.** Sequencing result for the antisense RNAs in C5 cells detected by 3' RACE PCR.

**Text S3.** Sequencing result for 5' RACE PCR result of D1 antisense lncRNAs.

**Text S4.** Sequencing result for the antisense RNAs in E3 cells detected by 3' RACE PCR.

**Text S5.** Sequencing result for the antisense RNAs in PA5 cells detected by 5' RACE.

**Supporting text S1:** Sequencing result for C5-AS1 lncRNAs

The sequence underlined is the 5' adaptor.

The sequence in red is the vector sequence.

The starting site for C5-AS1 is represented by the lowercase "t", which is located at the neighboring genomic region about 700 bp from the 3' terminal of the integrated vector.

CGACTGGAGCACGAGGACACTGACATGGACTGAAGGAGTAGAAAtTTTTTGGTAATTACCTT  
ATTTTAGTAAAAGTTTGGAAAGATTAAAACAGATACACATATGTTTCCAGGCTTAGTGAAGGG  
GATGTACCAACTTCAAAGAATTA AAAAGAAAATGGCTTTTTACCTAAATAACCTTTTGTGCT  
GGTAGTATAGCTTGTGCTAATTTTTGTAATGTTTAAGTAATGAAATAATTCTACATATCAGG  
TCCTTTTTATTTAGAACATCGACTTCCTAATATCATCCGAATAAATACTCTGGACATAGTAG  
GTGAAAGTATTTTGTTAACAACCTTCTTTCTGGCCAAGCATGGTGGCTCATGCCTGTGGTCCC  
AACACTTTGGGAGGCTGAGGTGGGGAGATCACTTGAACCTATGGATTTGAGACCAGCCTGGG  
CAGCATGGCAAAACACTTGTTTCTAAAAA AAAAAACCACGGCTGGGCGCAGTGA CTACGCC  
TGTAATCCCAACACTTTGGGAGGCTGAGGAAGGGTGGATCACCTGAGGTCAGAAATTTGAGA  
CCAGCCTGGCCAACATGGTGAACCTCATCTCTACTAAAAATACAAAAATTAGCCAGGCATG  
GTTGTGGGCGCCTGTAATCCCAGCTACTCGGGAGGCTGAGGCAGGAGAATTGCTTGAAGCCG  
GGAAGCAGAGGTTGCAGTGAGCCAAGATTGCACCACTGCACTCCAGCCTGGGCAACAGAGTG  
TGCTAGAGATTTTCCACACTGACTAAAAGGGTCTGAGGGATCTCTAGTTACCAGAGTCACAC  
AACAGACGGGCACACACTACTTGAAGCACTCAAGGCAAGCTTTATTGAGGCTTAAGCAGTGG  
GTTCCCTAGTTAGCCAGAGAGCTCCCAGGCTCA

**Supporting text S2:** Sequencing result for the antisense RNAs in C5 cells detected by 3' RACE PCR.

The sequence of the 3' terminus of virus vector was shown. The red underlined letters are the detected termini of antisense RNAs that are transcribed into the integration sites. The underlined sequences are the primer binding sites.

CAAAATTTTCGGGTTTATTACAGGGACAGCAGAGATCCAGTTTGGGGATCCTGAGCGGCCGC  
AAGGTGACCCGTCTAGAGATGGATCCCCGGGCTGCAGGAATTCGATGATCCAGTATTACCG  
CCATGCATTAGTTATTAATAGTAATCAATTACGGGGTCATTAGTTCATAGCCCATATATGGA  
GTTCCGCGTTACATAACTTACGGTAAATGGCCCGCCTGGCTGACCGCCCAACGACCCCGCC  
CATTGACGTCAATAATGACGTATGTTCCCATAGTAACGCCAATAGGGACTTTCCATTGACGT  
CAATGGGTGGAGTATTTACGGTAAACTGCCACTTGGCAGTACATCAAGTGTATCATATGCC  
AAGTACGCCCCCTATTGACGTCAATGACGGTAAATGGCCCGCCTGGCATTATGCCCAGTACA  
TGACCTTATGGGACTTTCTACTTGGCAGTACATCTACGTATTAGTCATCGCTATTACCATG  
GTGATGCGGTTTTGGCAGTACATCAATGGGCGTGGATAGCGGTTTGACTCACGGGGATTTCC  
AAGTCTCCACCCATTGACGTCAATGGGAGTTTGTTTTGGCACCAAAAATCAACGGGACTTTC  
CAAAATGTCGTAACAACCTCCGCCCCATTGACGCAAATGGGCGGTAGGCGTGTACGGTGGGAG  
GTCTATATAAGCAGAGCTGGTTTTAGTGAACCGTCAGATCCGGTAGCGCTACCGGTGCGCCACC  
ATGGTGAGCAAGGGCGAGGAGCTGTTACCGGGGTGGTGCCCATCCTGGTTCGAGCTGGACGG  
CGACGTAAACGGCCACAAGTTCAGCGTGTCCGGCGAGGGCGAGGGCGATGCCACCTACGGCA  
AGCTGACCCTGAAGTTCATCTGCACCACCGGCAAGCTGCCCGTGCCCTGGCCCACCCCTCGTG  
ACCACCCTGACCTACGGCGTGCAGTGCTTCAGCCGCTACCCCGACCACATGAAGCAGCACGA  
CTTCTTCAAGTCCGCCATGCCCGAAGGCTACGTCCAGGAGCGCACCATCTTCTTCAAGGACG  
ACGGCAACTACAAGACCCGCGCCGAGGTGAAGTTCGAGGGCGACACCCCTGGTGAACCGCATC  
GAGCTGAAGGGCATCGACTTCAAGGAGGACGGCAACATCCTGGGGCACAAGCTGGAGTACAA  
CTACAACAGCCACAACGTCTATATCATGGCCGACAAGCAGAAGAACGGCATCAAGGTGAACT  
TCAAGATCCGCCACAACATCGAGGACGGCAGCGTGCAGCTCGCCGACCACTACCAGCAGAAC  
ACCCCATCGGGACGGCCCCGTGCTGCTGCCGACAACCACTACCTGAGCACCCAGTCCGC  
CCTGAGCAAAGACCCCAACGAGAAGCGCGATCACATGGTCCTGCTGGAGTTCGTGACCGCCG  
CCGGGATCACTCTCGGCATGGACGAGCTGTACAAGTGAAGTATCATCAAGCTGGGCTGCAGGA  
ATTGATATCAAGCTTATCGATAATCAACCTCTGGATTACAAAATTTGTGAAAGATTGACTG  
GTATTCTTAACTATGTTGCTCCTTTTACGCTATGTGGATACGCTGCTTTAATGCCTTTGTAT  
CATGCTATTGCTTCCCGTATGGCTTTTCAATTTTCTCCTCCTTGTATAAAATCCTGGTTGCTGTC  
TCTTTATGAGGAGTTGTGGCCGTTGTCAGGCAACGTGGCGTGGTGTGCACTGTGTTGCTG  
ACGCAACCCCCACTGGTTGGGGCATTGCCACCACCTGTCAGCTCCTTTCCGGGACTTTCGCT  
TTCCCCCTCCCTATTGCCACGGCGGAACTCATCGCCGCTGCCTTGCCCG

**Supporting text S3:** Sequencing result for 5' RACE PCR result of D1 antisense lncRNAs

The sequence underlined is the 5' adaptor.

The sequence in red is the vector sequence.

The starting site for the antisense lncRNA is represented by the lowercase "c", which is located at about 743bps from the 3' terminal of the integrated vector.

CGACTGGAGCACGAGGACACTGACATGGACTGAAGGAGTAGAAAcTTTAAACTCAATATAGC  
ATTTATCATCATCTCTTCCCTCCCCTTGTAAAGAACTAGCTTGTTCCAAATATGGCATT  
TCTTTTCCAAGTTCTAGGGTTTAGGCATGACATAATTCCTTTAAAGAATTATTTTTCTTGTC  
ATGACTGACAAGCATGACTTAAATGGAGATAAACAGGCTACTGAAAAACATTTGGGAATTTT  
TCTGATTACAACCTGCTCTTATTTTTATTTTTTTTTTTTTTTGAGACAGAGTCTCGCTCTGTCGC  
CCAGGCTGGAGTGCAGTGGCGCAATCTCAACTCACTGCAACCTTCGCCTCCCAGGTTCAAGC  
GATTCTCCTGCCTCAGCTGCCTGAGTAGCTGGGACTACAGGTACCCACCACCAGGCCTAAAT  
AATTTTTGTATTGTTAGTAGAGACGGGTTTCACCATGTTGGCCAGGCTGGTGTCAAACCTCCT  
GACCTCAGGTGATCCACCTCGGCCTCCCAAAGTGCTGGGATTACAGGCGTGAGCCACCATGC  
CCAGTGTACAATTGCTCTTTTATGATGAGAGAAAAACAATGTATAGCTTTAAAATGGGGAAT  
CCACATAAAACTATCTTCCCTTTGAACTCCAGTACAGGGGCTTTTGCCAATTAACAAGTCA  
CCTCCACCTGAGGAAAGAGGCAGACGCTGCCTGCCCAGGATGCTGTAGAAGGGATTCTTCC  
ATGGATAGAAAGTTTCTCTGCATAACTTTTGTAAAGGTCCTTTTGCTAGAGATTTTCCACAC  
TGACTAAAAGGGTCTGAGGGATCTCTAGTTACCAGAGTCACACAACAGACGGGCACACACTA  
CTTGAAGCACTCAAGGCAAGCTTTATTGAGGCTTAAGCAGTGGGTTCCCTAGTTAGCCAGAG  
AGCTCCAGGCTCA

**Supporting text S4:** The sequencing result for the antisense RNAs in E3 cells detected by 3' RACE PCR.

The red underlined letters are the detected termini of antisense RNAs that are transcribed into the integration sites. The underlined sequences are the primer binding sites.

TACGGTAAACTGCCCACTTGGCAGTACATCAAGTGTATCATATGCCAAGTACGCCCCCTATT  
GACGTCAATGACGGTAAATGGCCCCGCTGGCATTATGCCCAGTACATGACCTTATGGGACTT  
TCCTACTTGGCAGTACATCTACGTATTAGTCATCGCTATTACCATGGTGTATGCGGTTTTGGC  
AGTACATCAATGGGCGTGGATAGCGGTTTGACTCACGGGGATTTCCAAGTCTCCACCCCATT  
GACGTCAATGGGAGTTTTGTTTTGGCACAAAATCAACGGGACTTTCCAAAATGTTCGTAACAA  
CTCCGCCCCATTGACGCAAATGGGCGGTAGGCGTGTACGGTGGGAGGTCTATATAAGCAGAG  
CTGGTTTTAGTGAACCGTCAGATCCGGTAGCGCTACCGGTCGCCACCATGGTGAGCAAGGGCG  
AGGAGCTGTTACCGGGGTGGTGCCCATCTGGTTCGAGCTGGACGGCGACGTAAACGGCCAC  
AAGTTCAGCGTGTCCGGCGAGGGCGAGGGCGATGCCACCTACGGCAAGCTGACCCTGAAGTT  
CATCTGCACCACCGGCAAGCTGCCCCGTGCCCTGGCCCACCCTCGTGACCACCCTGACCTACG  
GCGTGCAGTGCTTCAGCCGCTACCCCGACCACATGAAGCAGCACGACTTCTTCAAGTCCGCC  
ATGCCCGAAGGCTACGTCCAGGAGCGCACCATCTTCTTCAAGGACGACGGCAACTACAAGAC  
CCGCGCCGAGGTGAAGTTCGAGGGCGACACCCTGGTGAACCGCATCGAGCTGAAGGGCATCG  
ACTTCAAGGAGGACGGCAACATCCTGGGGCACAAGCTGGAGTACAACACTACAACAGCCACAAC  
GTCTATATCATGGCCGACAAGCAGAAGAACGGCATCAAGGTGAACTTCAAGATCCGCCACAA  
CATCGAGGACGGCAGCGTGCAGCTCGCCGACCACTACCAGCAGAACACCCCATCGGCGACG  
GCCCCGTGCTGCTGCCCGACAACCACTACCTGAGCACCCAGTCCGCCCTGAGCAAAGACCCC  
AACGAGAAGCGCGATCACATGGTCCTGCTGGAGTTCGTGACCGCCGCCGGGATCACTCTCGG  
CATGGACGAGCTGTACAAGTGAGGATCATCAAGCTGGGCTGCAGGAATTCGATATCAAGCTT  
ATCGATAATCAACCTCTGGATTACAAAATTTGTGAAAGATTGACTGGTATTCTTAACTATGT  
TGCTCCTTTTACGCTATGTGGATACGCTGCTTTAATGCCTTTGTATCATGCTATTGCTTCCC  
GTATGGCTTTTCATTTTCTCCTCCTTGTATAAATCCTGGTTGCTGTCTCTTTATGAGGAGTTG  
TGGCCCCTTGTGAGGCAACGTGGCGTGGTGTGCACTGTGTTTGTGACGCAACCCCCACTGG  
TTGGGGCATTGCCACCACCTGTCAGCTCCTTTCCGGGACTTTCGCTTTCCCCCTCCCTATTG  
CCACGGCGGAACTCATCGCCGCCTGCCTTGCCCG

**Supporting text S5:** Sequencing result for the antisense RNAs in PA5 cells detected by 5' RACE

The sequence underlined is the 5' adaptor.

The sequence in red is the vector sequence.

The starting site for the antisense lncRNA is represented by the lowercase "t", which is located at about 273 bp from the 3' terminal of the integrated vector.

TGGACACTGACATGGACTGAAGGAGTAGAAAtGACTACTAAGCATTCTATCCAATATTTCAA  
TAGATAGGTTTATTCAAACCTTATGGCTTTCATGACTCCCTACTCATATTTCTGTATGAATAA  
TAAAAATAATAATTTCCAACCCAGTTTTTCATGAGAGATAGTGTGGCATGATGTAAAAAGC  
CCTGGCTTTGGAGTAAGAAATAACTGGATTCAACTTATGGTCCTCTTAGGCTGTGTGACTTG  
AGGCTAGGTATATGAGCTCTCTAAACTTCAGTTTACTCAGCTAAAAAGTAGGTTAT**TGCTAG**  
**AGATTTCCACACTGACTAAAAGGGTCTGAGGGATCTCTAGTTACCAGAGTCACACAACAGA**  
**CGGGCACACACTACTTGAAGCACTCAAGGCAAGCTTTATTGAGGCTTAAGCAGTGGGTCCC**  
**TAGTTAGCCAGAGAGCTCCAGGCTCA**



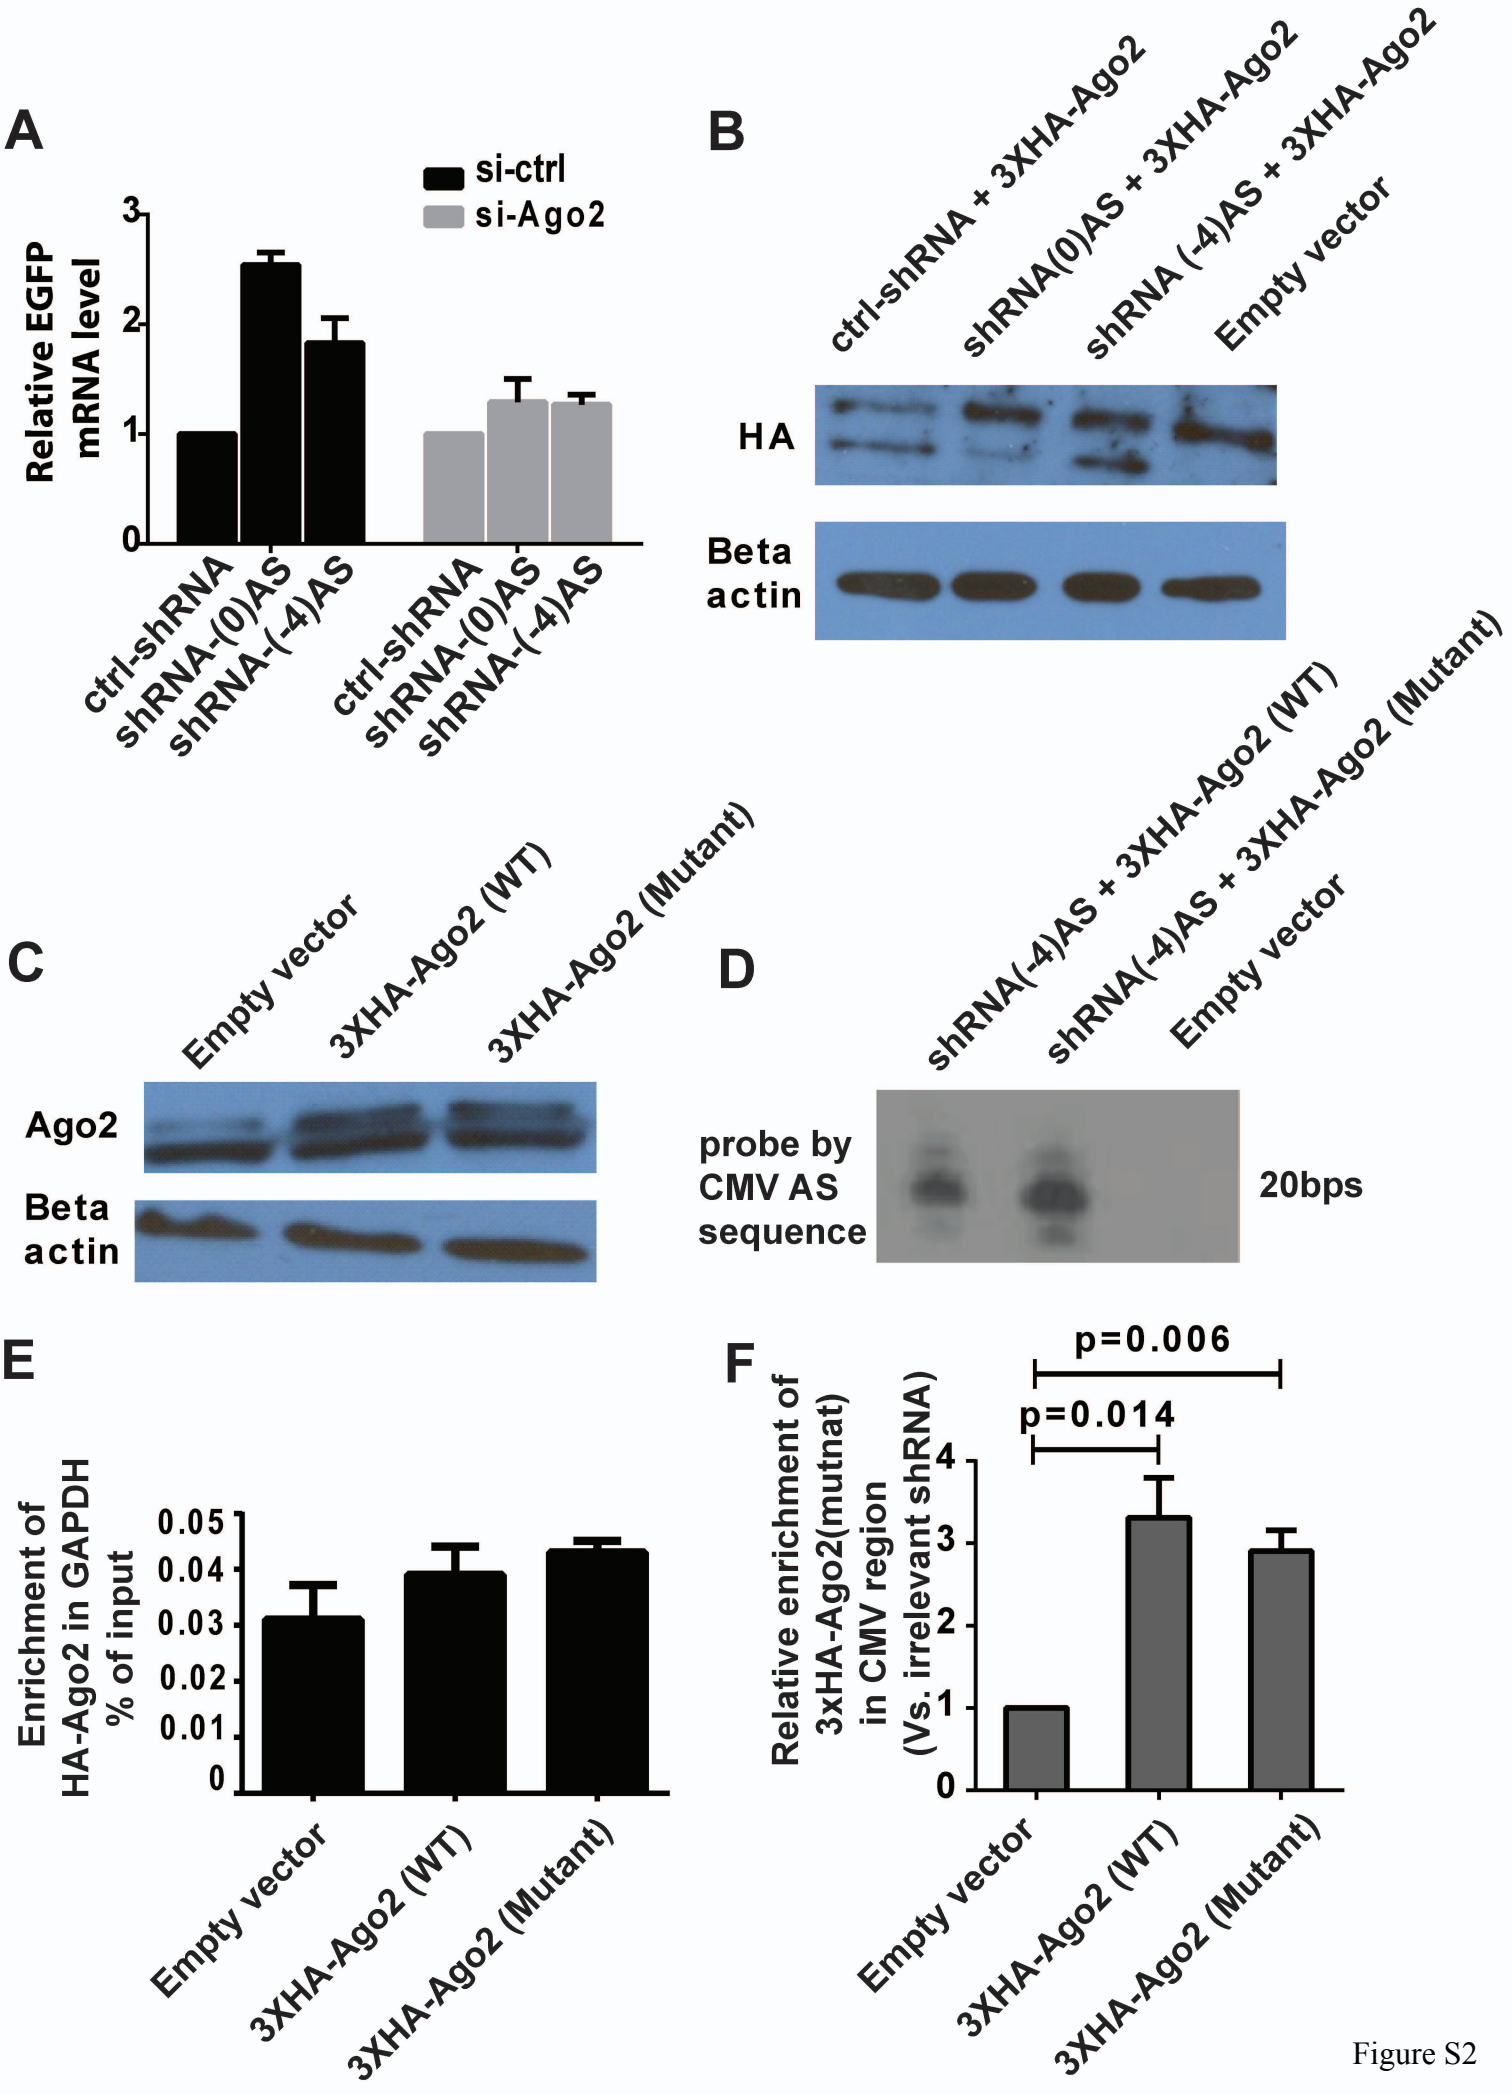

Figure S2

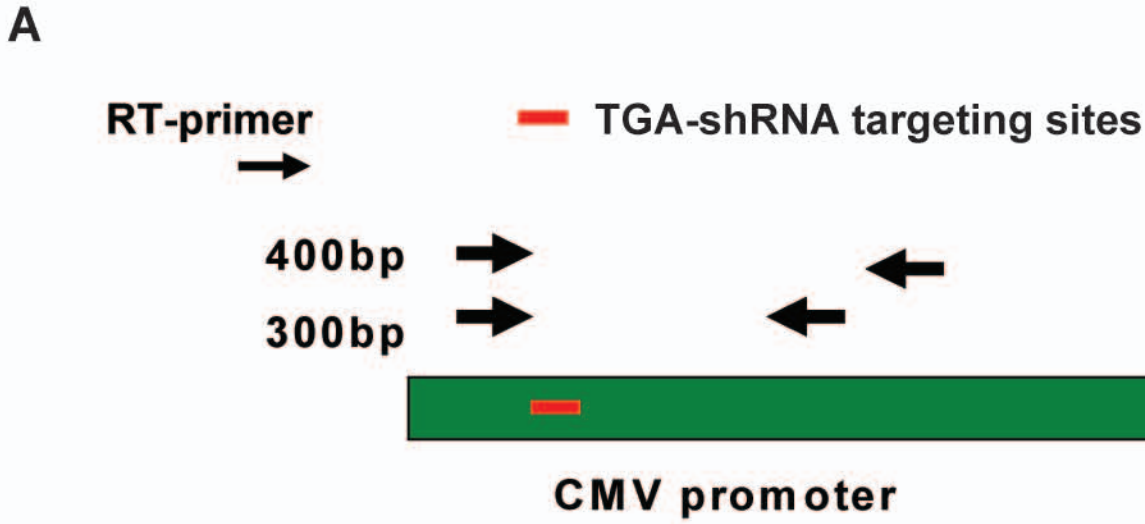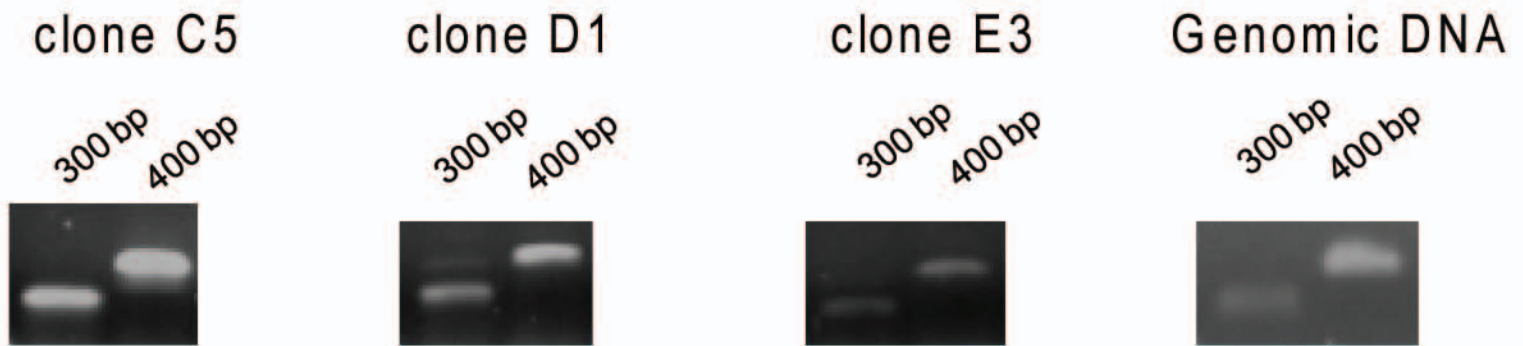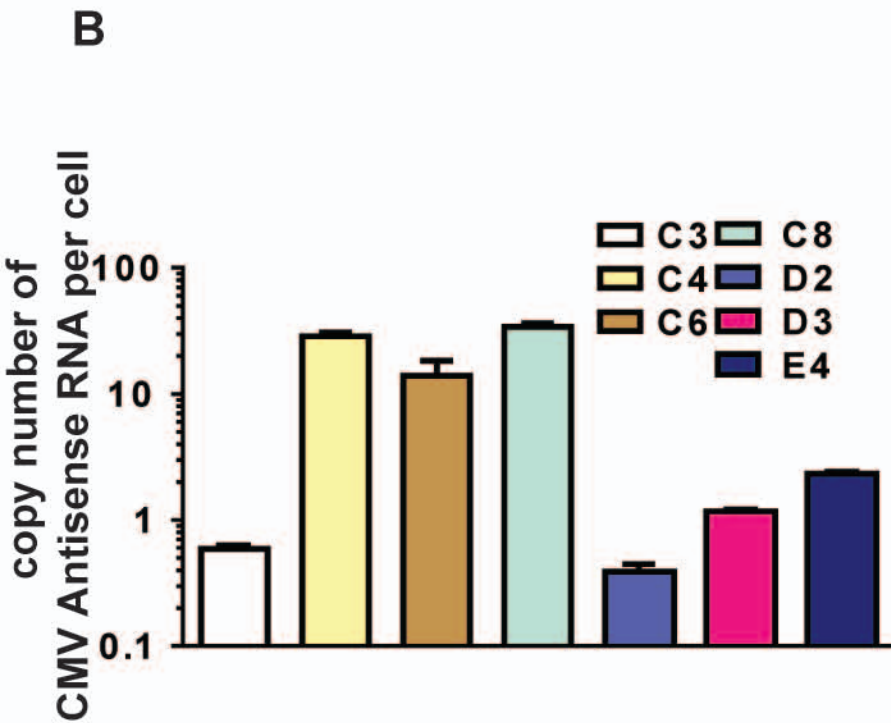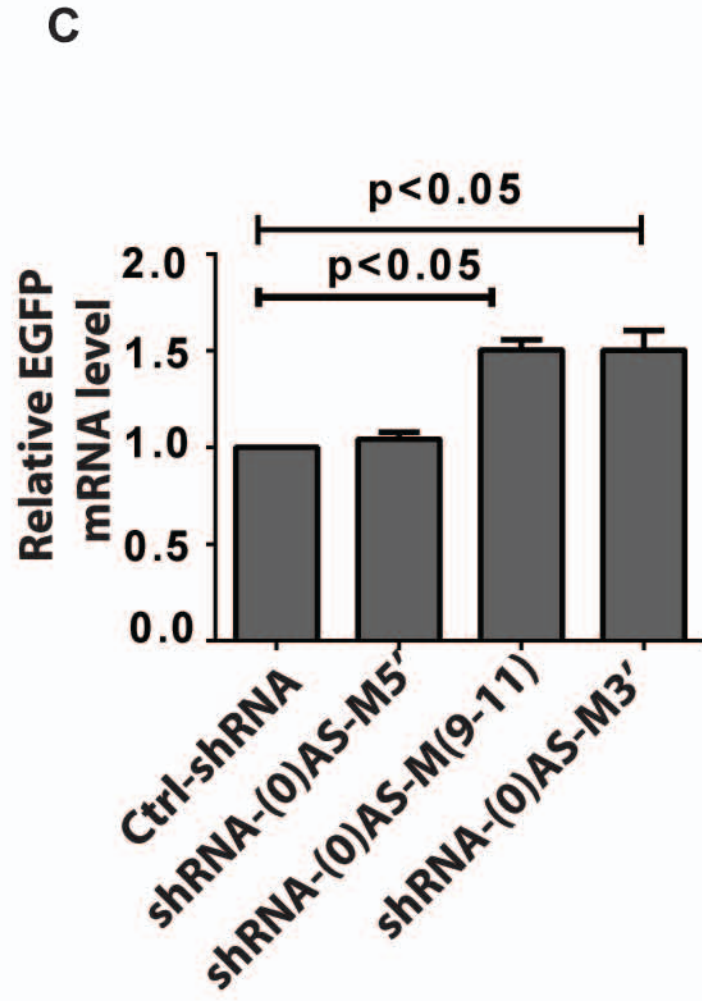

A

CIP/TAP/Ligation  
Ligation  
CIP/Ligation

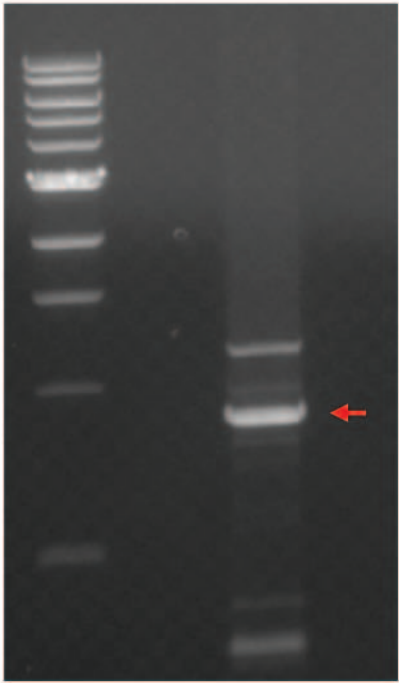

B

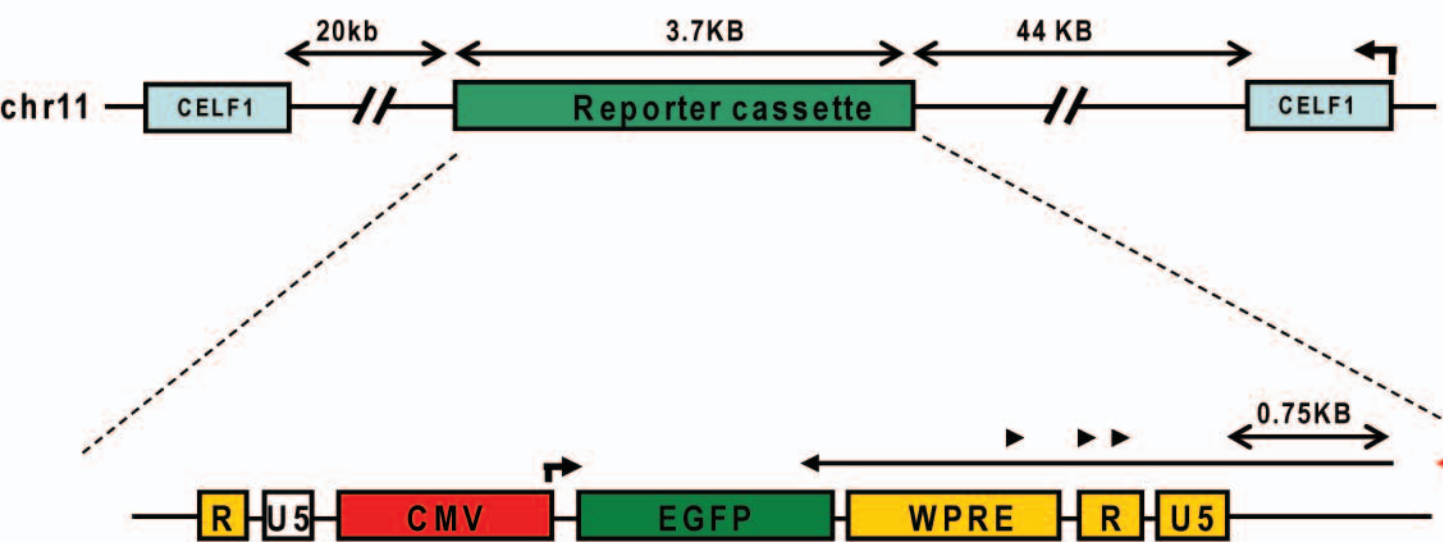

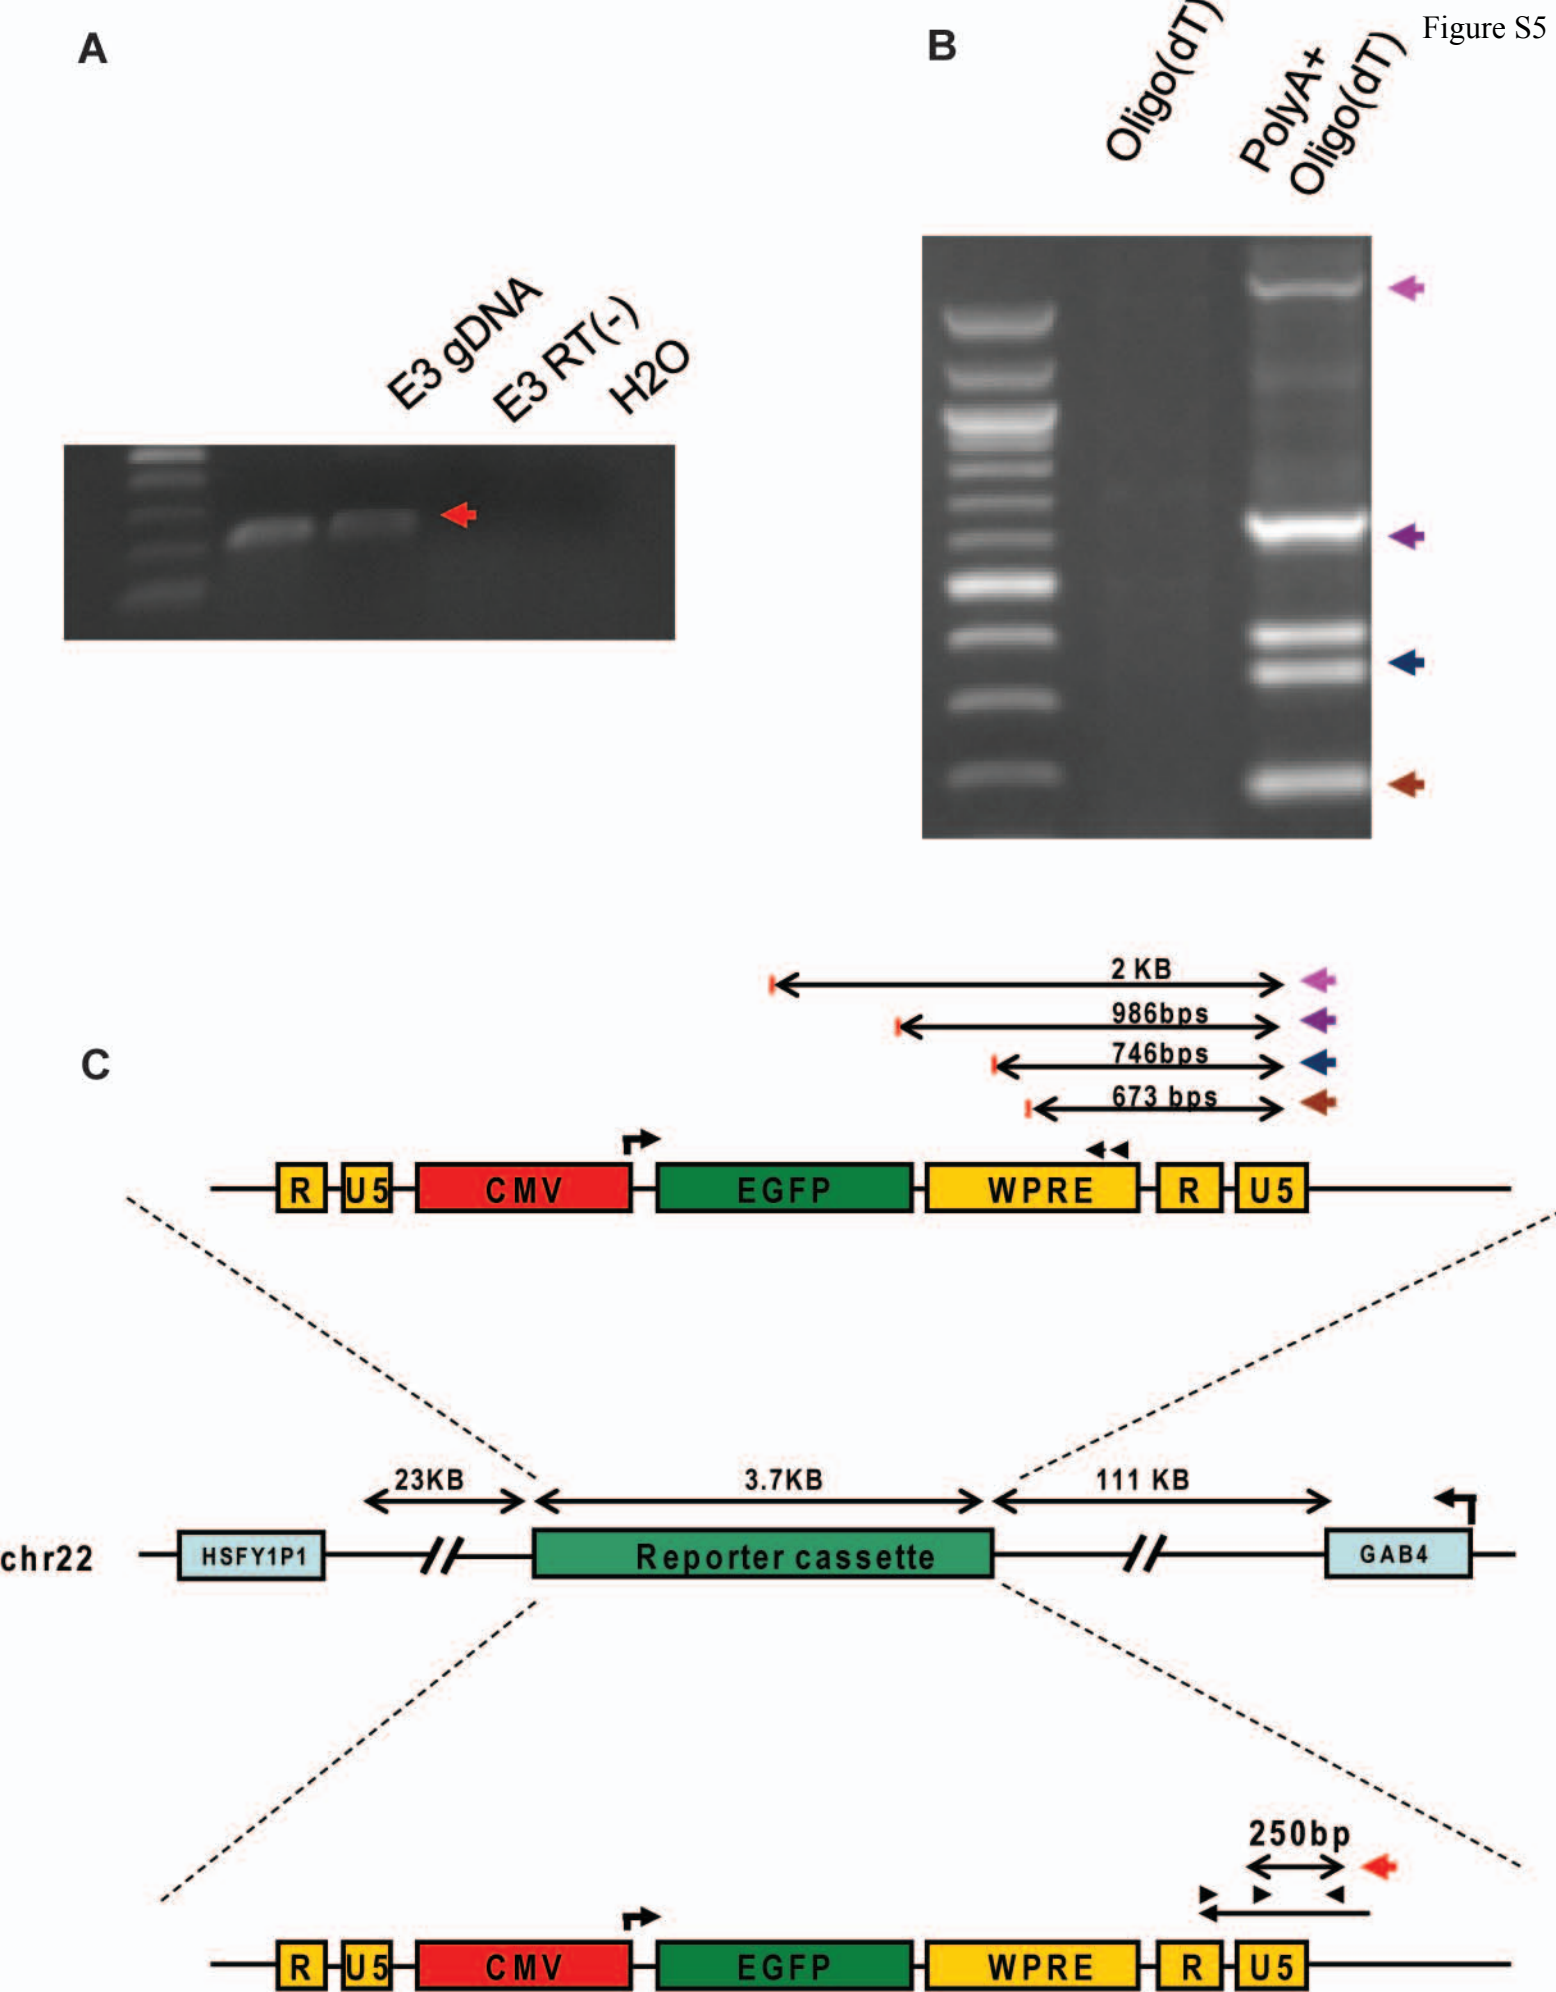

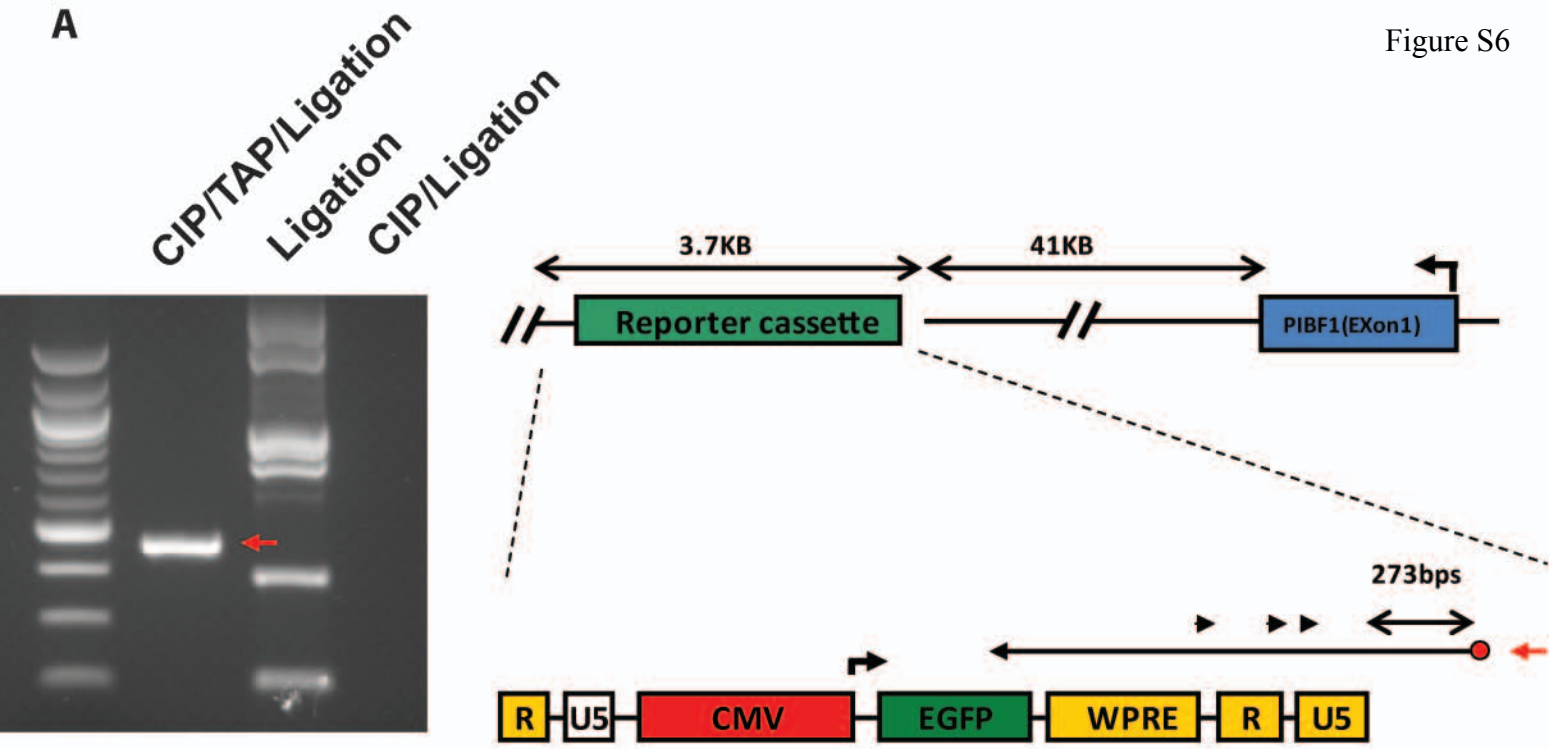

**B**

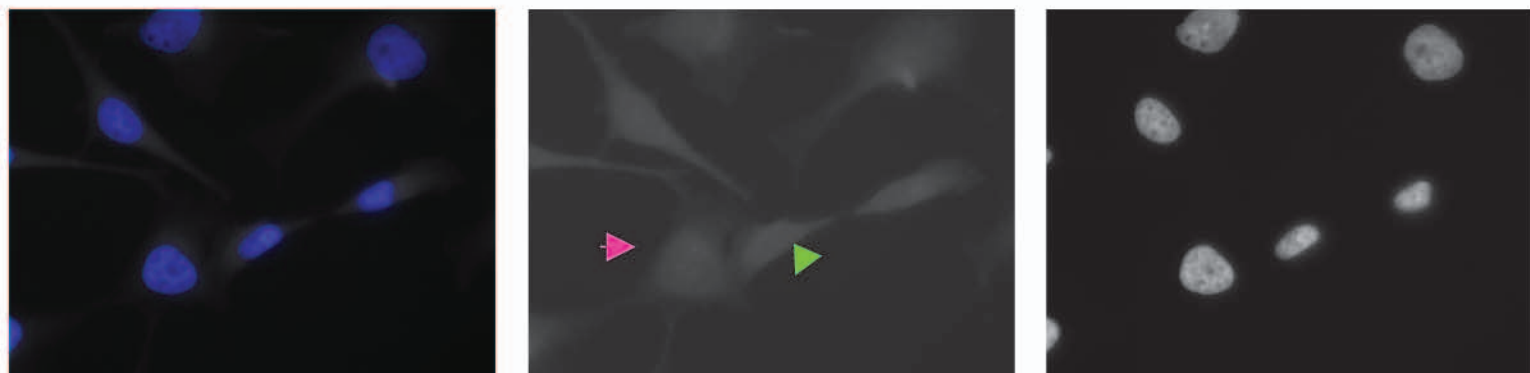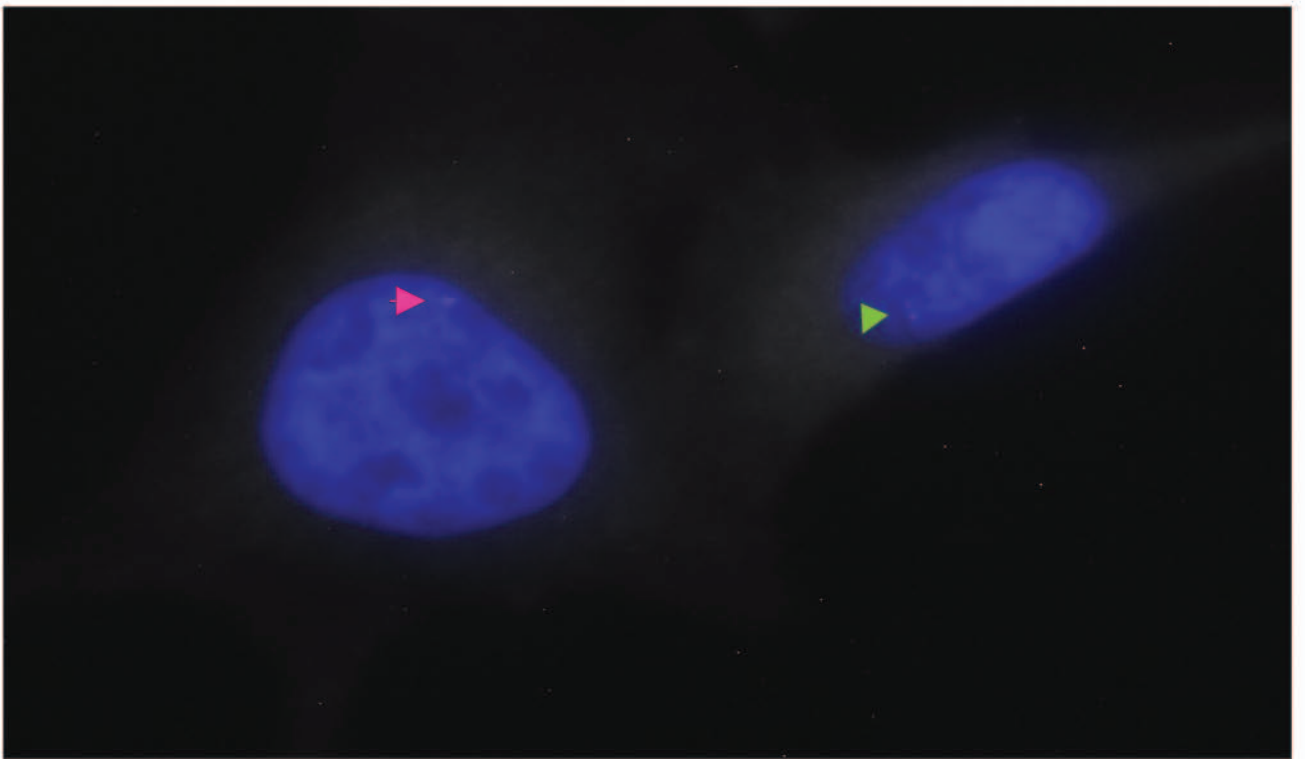

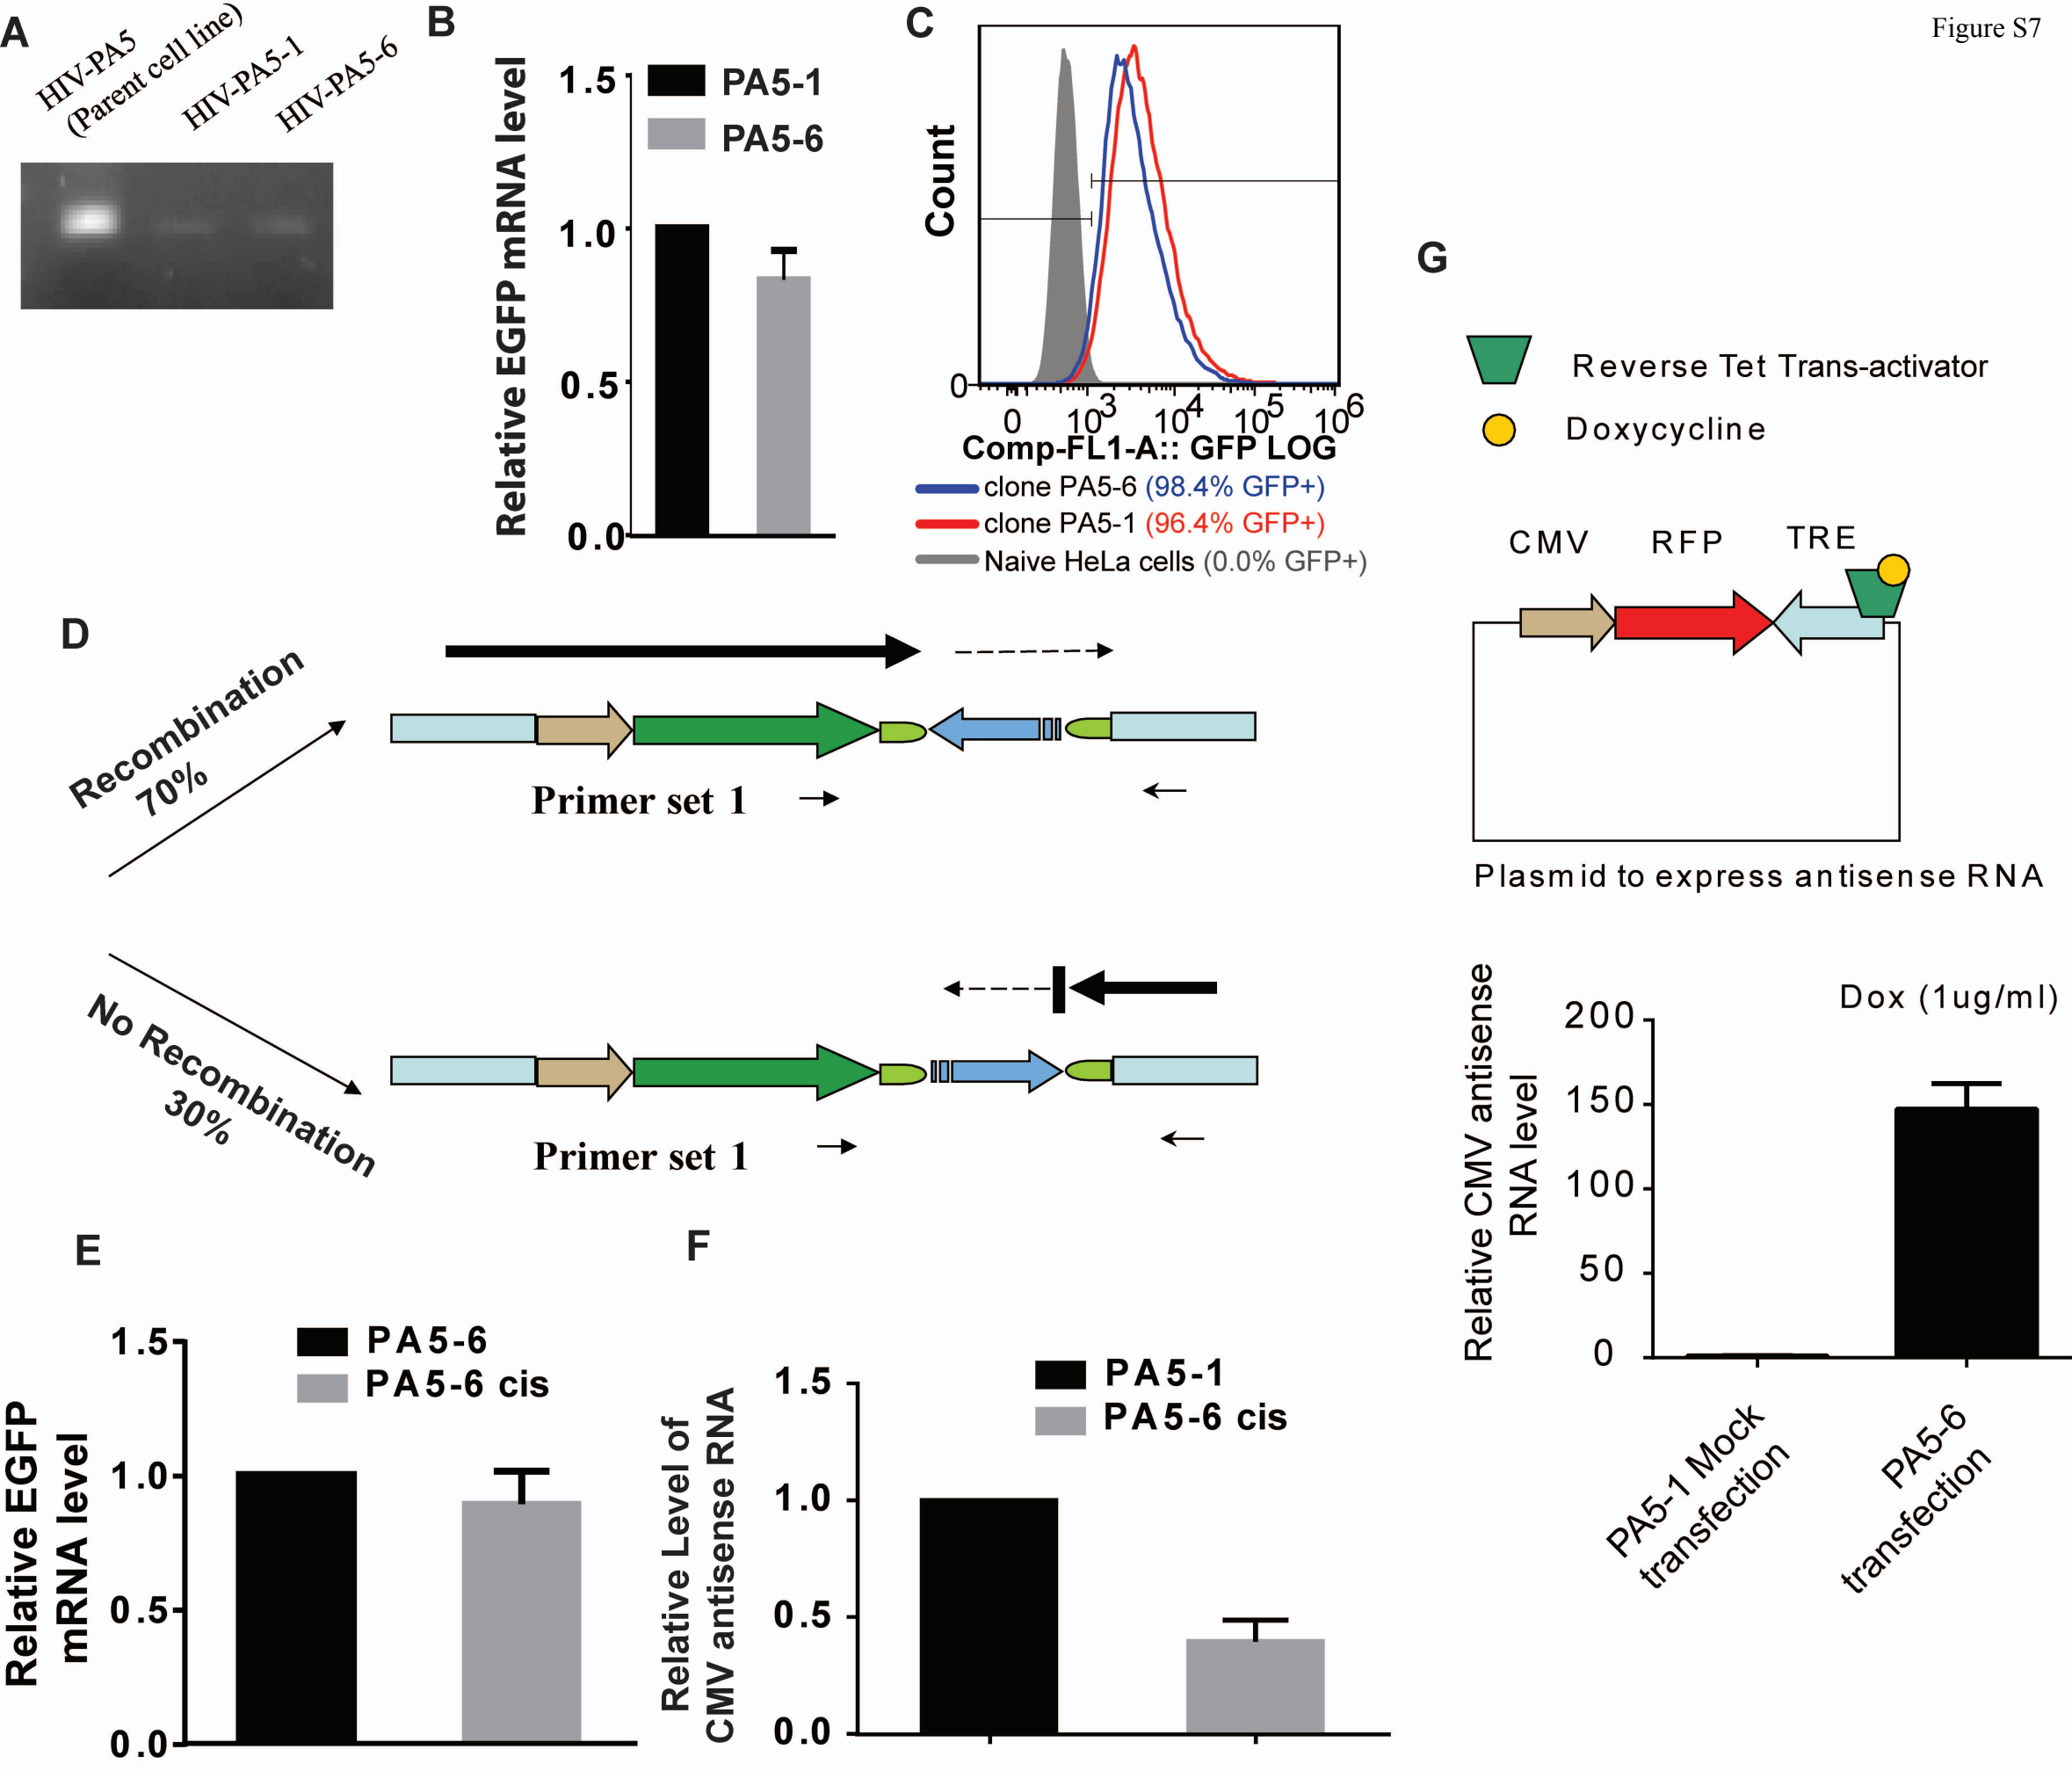

Supplement: SuppMaterial.pdf [file SuppMaterial.pdf]
